# Supplementary material for: Dispec: A Novel Peptide Scoring Algorithm Based on Peptide Matching Discriminability
Source: PLoS One. 2013 May 13;8(5):e62724. doi: 10.1371/journal.pone.0062724 (PMC3652849; doi:10.1371/journal.pone.0062724)
Supplement: Table S2 — The high-confidence peptides of the three algorithms. (XLS) [file pone.0062724.s003.xls]

## Sheet: Sheet1
The high-confidence peptides of the three algorithms
Instrument	Sum	Mascot	Sequest	Dispec
D39 dataset
LTQ-Orbitrap	3237	3221	2723	3225
		0.9951	0.8412	0.9963
18 Standard Proteins Mixture
FT	679	673	579	675
		0.9912	0.8527	0.9941
LCQ	438	405	412	416
		0.9247	0.9406	0.9498
LTQ	594	583	487	585
		0.9815	0.8199	0.9848
QTOF	298	293	277	292
		0.9832	0.9295	0.9799
E. coli dataset
E. coli1	657	649	437	652
		0.9878	0.6651	0.9924
E. coli2	551	543	398	546
		0.9855	0.7223	0.9909
E. coli3	499	488	356	491
		0.978	0.7134	0.984
